# Supplementary material for: Differential Flavonoid and Other Phenolic Accumulations and Antioxidant Activities of Nymphaea lotus L. Populations throughout Thailand
Source: MDPI journal article supplement (doi:10.3390/molecules27113590), 2022-06-02
Supplement: s1 [file s1]

# Differential Flavonoid and Other Phenolic Accumulations and Antioxidant Activities of *Nymphaea lotus* L. Populations Throughout Thailand

Duangjai Tungmunnithum <sup>1,2,3,\*</sup>, Samantha Drouet <sup>2</sup>, Laurine Garros <sup>2</sup> and Christophe Hano <sup>2,3,\*</sup>

<sup>1</sup> Department of Pharmaceutical Botany, Faculty of Pharmacy, Mahidol University, Bangkok 10400, Thailand

<sup>2</sup> Laboratoire de Biologie des Ligneux et des Grandes Cultures, INRAE USC1328, Campus Eure et Loir, Orleans University, 28000 Chartres, France; samantha.drouet@univ-orleans.fr

<sup>3</sup> Le Studium Institute for Advanced Studies, 1 Rue Dupanloup, 45000 Orléans, France

\* Correspondence: duangjai.tun@mahidol.ac.th (D.T.); hano@univ-orleans.fr (C.H.)

## Contents

**Figure S1.** Loading scores of the component 1 and component 2 of the PCA (presented in Figure 5) linking the phytochemical profile and antioxidant capacity of the stamen and perianth extracts of 13 *N. lotus* populations originating from various floristic regions from Thailand.

**Figure S2.** Calibration curves for A. TPC (total phenolic content), B. TFC (total flavonoid content) and C. MAC (total monomeric anthocyanin content).

**Table S1.** HPLC quantification of the main flavonoids in the stamen (A) and perianth (B) extracts of the 13 *N. lotus* populations from their natural habitats cover the whole floristic regions in Thailand.

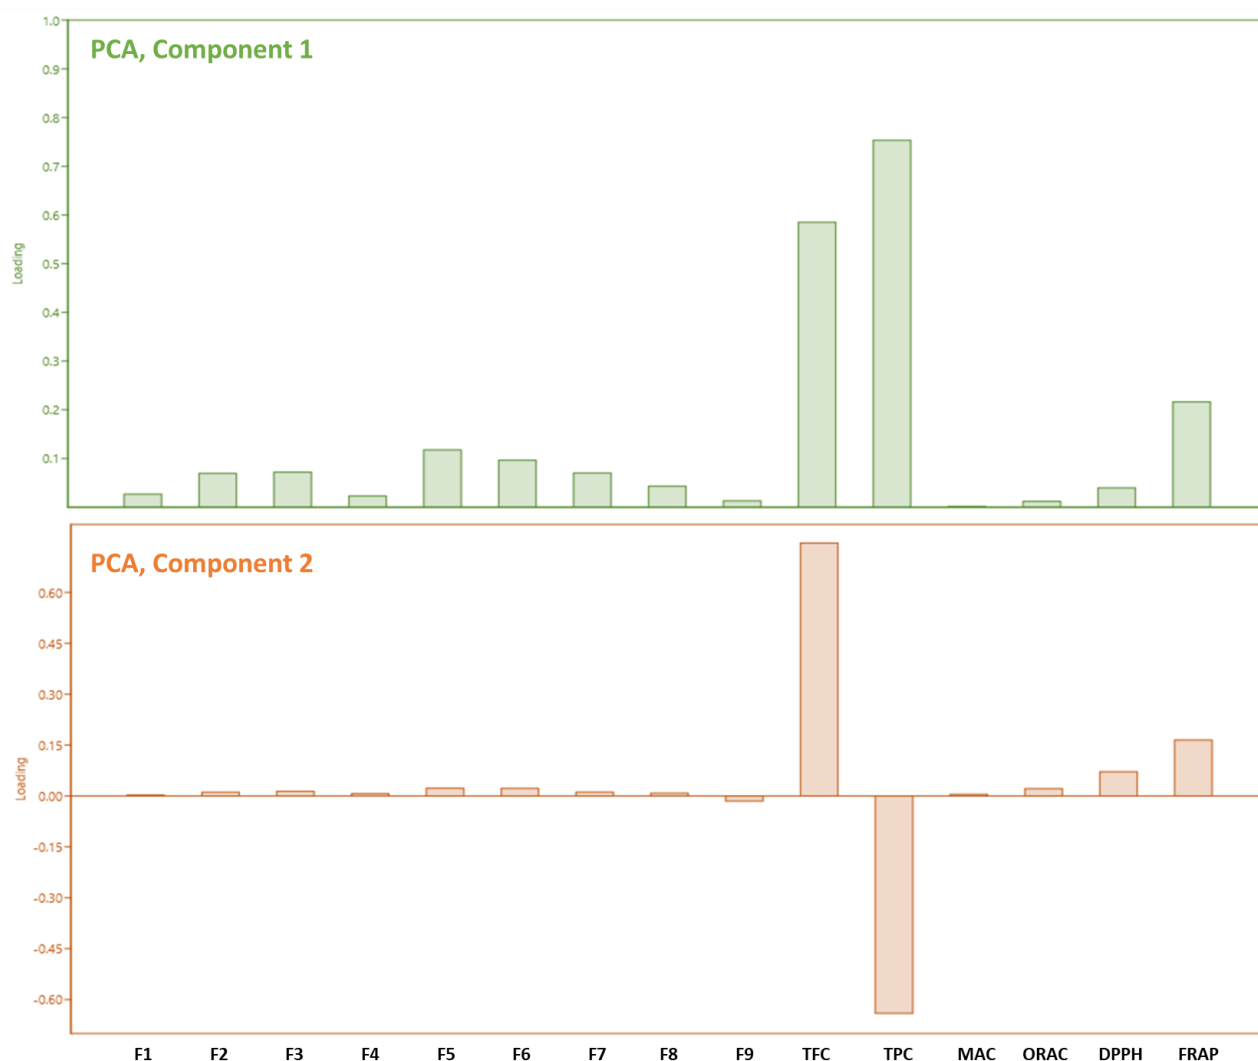

**Figure S1. Loading scores of the component 1 and component 2 of the PCA (presented in Figure 5) linking the phytochemical profile and antioxidant capacity of the stamen and perianth extracts of 13 *N. lotus* populations originating from various floristic regions from Thailand.** F1: Myricetin 3-O-galactoside; F2: Myricetin 3'-O-xyloside; F3: Quercetin 3-O-rhamnoside; F4: Chalcononaringenin 2''-O-galactoside; F5: Kaempferol 3-O-galactoside; F6: Quercetin 3'-O-xyloside; F7: Isorhamnetin 7-O-galactoside; F8: Isorhamnetin 7-O-xyloside; F9: Isorhamnetin 3-O-xyloside; TFC: total flavonoid content; TPC: total phenolic content; MAC: monomeric anthocyanin content; ORAC, DPPH and FRAP: *in vitro* antioxidant assays.

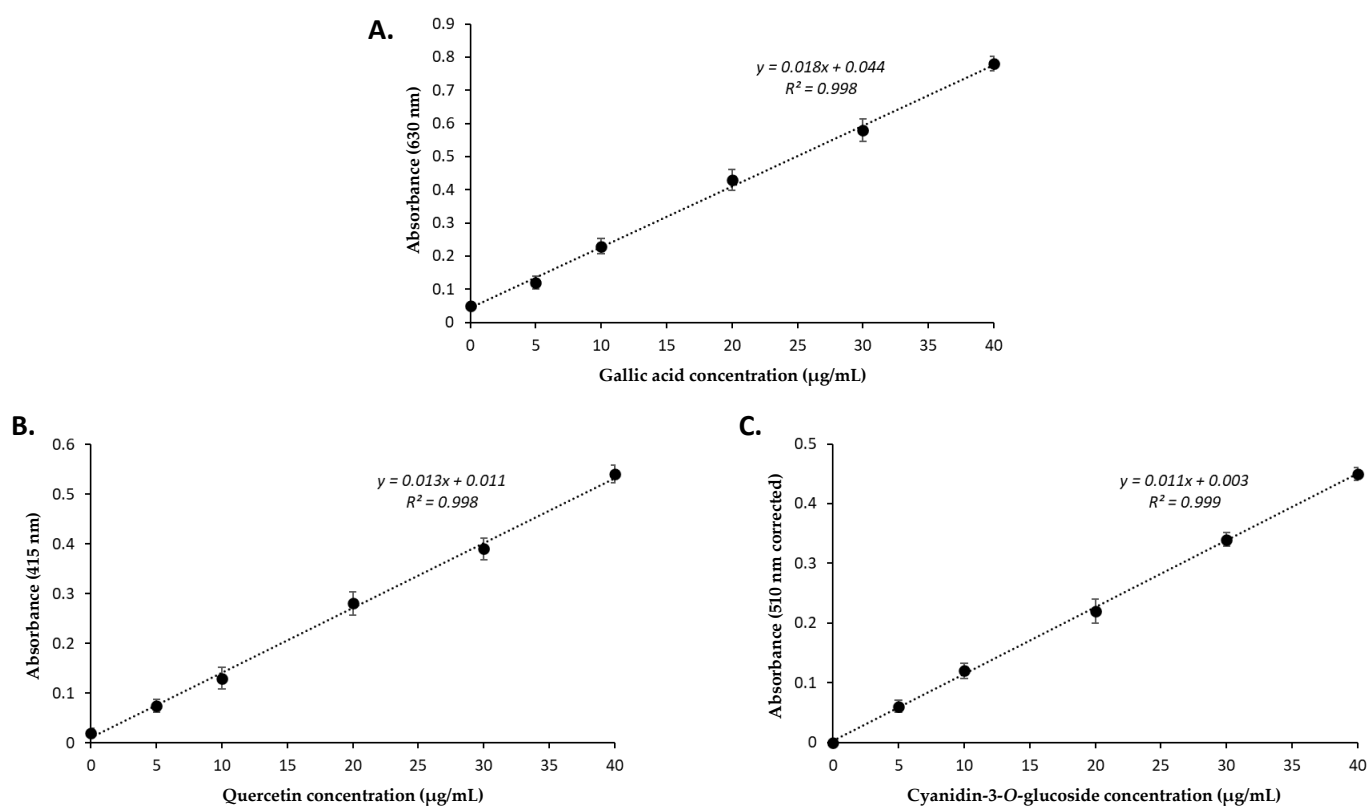

Figure S2. Calibration curves for A. TPC (total phenolic content), B. TFC (total flavonoid content) and C. MAC (total monomeric anthocyanin content).

**Table S1. HPLC quantification of the main flavonoids in the stamen (A) and perianth (B) extracts of the 13 *N. lotus* populations from their natural habitats cover the whole floristic regions in Thailand.**

| Sample | F1   |     | F2   |      | F3   |     | F4   |     | F5    |      | F6    |      | F7   |      | F8   |     | F9   |     |
|--------|------|-----|------|------|------|-----|------|-----|-------|------|-------|------|------|------|------|-----|------|-----|
|        | mean | SD  | mean | SD   | mean | SD  | mean | SD  | mean  | SD   | mean  | SD   | mean | SD   | mean | SD  | mean | SD  |
| NLs#1  | 28.9 | 1.0 | 74.3 | 2.9  | 77.7 | 3.0 | 26.4 | 1.0 | 128.3 | 4.9  | 105.6 | 4.0  | 75.9 | 2.9  | 45.4 | 1.8 | 10.8 | 0.6 |
| NLs#2  | 25.9 | 0.0 | 71.5 | 0.1  | 74.8 | 0.1 | 25.4 | 0.0 | 123.4 | 0.1  | 101.6 | 0.1  | 73.0 | 0.1  | 44.7 | 0.0 | 6.2  | 0.0 |
| NLs#3  | 29.8 | 0.3 | 79.6 | 0.8  | 83.2 | 0.8 | 28.3 | 0.3 | 137.3 | 1.4  | 113.0 | 1.1  | 81.2 | 0.8  | 49.7 | 0.5 | 18.0 | 0.2 |
| NLs#4  | 23.4 | 0.1 | 64.7 | 0.2  | 67.6 | 0.3 | 21.0 | 0.1 | 111.6 | 0.4  | 91.8  | 0.3  | 66.0 | 0.3  | 40.4 | 0.2 | 14.6 | 0.1 |
| NLs#5  | 20.8 | 0.6 | 60.0 | 1.6  | 65.9 | 1.6 | 22.4 | 0.6 | 108.7 | 2.7  | 89.5  | 2.2  | 64.3 | 1.6  | 39.4 | 1.0 | 14.3 | 0.4 |
| NLs#6  | 29.4 | 2.4 | 77.2 | 6.6  | 73.4 | 6.9 | 24.9 | 2.3 | 121.1 | 11.4 | 99.7  | 9.4  | 71.6 | 6.8  | 43.8 | 4.1 | 15.9 | 1.5 |
| NLs#7  | 23.9 | 0.0 | 66.0 | 0.1  | 69.0 | 0.1 | 23.4 | 0.0 | 113.9 | 0.2  | 93.7  | 0.1  | 67.4 | 0.1  | 41.2 | 0.1 | 14.9 | 0.0 |
| NLs#8  | 21.5 | 0.2 | 59.6 | 0.5  | 62.3 | 0.5 | 21.1 | 0.2 | 102.7 | 0.8  | 84.6  | 0.7  | 60.8 | 0.5  | 37.2 | 0.3 | 13.5 | 0.1 |
| NLs#9  | 7.9  | 0.6 | 52.1 | 1.6  | 54.6 | 1.6 | 12.6 | 0.6 | 90.1  | 2.7  | 72.3  | 2.2  | 56.2 | 1.6  | 31.4 | 1.0 | 7.5  | 0.4 |
| NLs#10 | 22.1 | 0.7 | 61.2 | 1.9  | 63.9 | 2.0 | 21.7 | 0.7 | 105.5 | 3.3  | 86.8  | 2.7  | 62.4 | 1.9  | 38.2 | 1.2 | 13.8 | 0.4 |
| NLs#11 | 20.2 | 2.1 | 58.6 | 5.8  | 61.2 | 6.0 | 17.8 | 2.1 | 108.1 | 10.0 | 85.2  | 8.2  | 59.8 | 5.9  | 33.6 | 3.6 | 13.3 | 1.3 |
| NLs#12 | 21.8 | 1.2 | 60.2 | 3.4  | 62.9 | 3.6 | 21.4 | 1.2 | 103.9 | 5.9  | 80.5  | 4.9  | 61.4 | 3.5  | 37.6 | 2.1 | 16.6 | 0.8 |
| NLs#13 | 28.2 | 0.5 | 64.3 | 1.4  | 67.2 | 1.5 | 22.8 | 0.5 | 110.8 | 2.5  | 91.2  | 2.0  | 68.6 | 1.5  | 40.1 | 0.9 | 14.5 | 0.3 |
| NLp#1  | 27.4 | 0.9 | 54.5 | 9.8  | 59.0 | 2.9 | 20.0 | 0.4 | 94.4  | 1.9  | 80.2  | 4.1  | 56.6 | 13.3 | 35.3 | 0.6 | 16.8 | 0.9 |
| NLp#2  | 10.2 | 0.3 | 39.2 | 6.6  | 40.9 | 0.6 | 13.9 | 0.5 | 67.5  | 1.6  | 55.6  | 3.8  | 40.0 | 0.7  | 24.5 | 0.4 | 4.9  | 0.6 |
| NLp#3  | 19.3 | 1.4 | 53.4 | 13.0 | 55.8 | 1.7 | 19.0 | 0.6 | 92.1  | 5.7  | 75.8  | 1.3  | 54.5 | 0.9  | 33.3 | 0.6 | 12.1 | 0.4 |
| NLp#4  | 17.0 | 0.2 | 47.2 | 12.8 | 49.3 | 1.1 | 16.7 | 0.6 | 88.3  | 2.6  | 64.0  | 28.1 | 44.1 | 0.7  | 23.4 | 0.8 | 15.7 | 0.3 |
| NLp#5  | 18.7 | 1.3 | 46.3 | 11.0 | 48.4 | 0.6 | 16.4 | 0.7 | 79.8  | 0.3  | 65.7  | 42.2 | 47.2 | 2.4  | 28.9 | 2.4 | 10.5 | 0.4 |
| NLp#6  | 7.9  | 0.2 | 35.8 | 1.4  | 37.4 | 2.7 | 12.7 | 0.7 | 65.7  | 3.0  | 55.8  | 3.8  | 36.5 | 0.6  | 22.3 | 1.5 | 3.1  | 0.1 |
| NLp#7  | 15.7 | 1.2 | 43.5 | 6.0  | 45.5 | 4.4 | 15.4 | 0.7 | 78.0  | 1.5  | 61.7  | 4.2  | 49.4 | 0.8  | 27.2 | 1.8 | 5.8  | 0.1 |
| NLp#8  | 13.4 | 0.7 | 37.1 | 1.4  | 38.7 | 3.6 | 13.2 | 0.7 | 63.9  | 1.3  | 52.6  | 3.6  | 37.8 | 1.3  | 23.1 | 2.0 | 8.4  | 0.4 |
| NLp#9  | 12.8 | 0.9 | 35.3 | 0.6  | 36.9 | 8.0 | 12.5 | 0.5 | 60.9  | 2.6  | 50.1  | 5.1  | 36.0 | 1.2  | 22.0 | 1.5 | 8.0  | 0.1 |
| NLp#10 | 14.7 | 0.7 | 40.8 | 0.3  | 42.6 | 1.0 | 14.5 | 0.2 | 70.3  | 3.8  | 57.9  | 5.9  | 41.6 | 0.7  | 25.5 | 0.9 | 9.2  | 0.2 |
| NLp#11 | 16.6 | 0.1 | 45.9 | 4.1  | 48.0 | 2.9 | 16.3 | 0.1 | 79.1  | 8.0  | 65.1  | 9.6  | 46.8 | 0.8  | 28.6 | 3.9 | 10.4 | 0.2 |
| NLp#12 | 12.5 | 0.5 | 34.5 | 0.2  | 36.1 | 2.8 | 12.3 | 0.3 | 59.6  | 3.0  | 49.0  | 5.6  | 35.2 | 0.6  | 21.6 | 0.4 | 7.8  | 0.1 |
| NLp#13 | 14.2 | 1.2 | 39.4 | 0.2  | 41.2 | 1.1 | 14.0 | 1.0 | 68.0  | 1.1  | 55.9  | 3.5  | 40.2 | 1.4  | 24.6 | 0.4 | 8.9  | 0.8 |

NL: *Nymphaea lotus* extract; s: stamen; p: perianth; #i indicate the population number i; F1: Myricetin 3-O-galactoside; F2: Myricetin 3'-O-xyloside; F3: Quercetin 3-O-rhamnoside; F4: Chalcononaringenin 2''-O-galactoside; F5: Kaempferol 3-O-galactoside; F6: Quercetin 3'-O-xyloside; F7: Isorhamnetin 7-O-galactoside; F8: Isorhamnetin 7-O-xyloside; F9: Isorhamnetin 3-O-xyloside. Means and standard deviations of 3 independent analysis.
